# Supplementary material
Source: publisher figshare collection journal article supplement (https://sage.figshare.com/ndownloader/files/14501747)
Supplement: Supplementary file 1 [file 14501747]

## Online appendix C – Analysis of necessity and sufficiency, robustness of the results

Description: in this appendix, technical details are provided about the analysis of necessity (section 1) and sufficiency. Concerning the latter, we examine limited diversity and logical remainders both for the outcome URBSPPRA (2) and for the negated outcome  $\sim$ URBSPPRA (4). A robustness test for the URBSPPRA analysis is also presented (3).

### 1. NECESSITY ANALYSIS

Presented here is the necessity analysis for both the outcome URBSPPRA and  $\sim$ URBSPPRA. The parameters of consistency and coverage are reported. No real necessary condition was found despite some high values of consistency, since logically contradictory cases exist for all the potential necessary conditions.

Table C.1: Necessity analysis for the outcome URBSPPRA

| Outcome : URBSPPRA |               |          |                               |                                                                                                            |
|--------------------|---------------|----------|-------------------------------|------------------------------------------------------------------------------------------------------------|
| Conditions         | Consistency   | Coverage | Logically contradictory cases |                                                                                                            |
| 1.                 | MUNAUT        | 0.892    | 0.703                         | Solothurn (0.33; 0.88) and Aargau (0.33; 0.69)                                                             |
|                    | $\sim$ MUNAUT | 0.303    | 0.478                         |                                                                                                            |
| 2.                 | INSFRA        | 0.887    | 0.698                         | Uri (0.45; 0.72), Obwalden (0.36; 0.66), Schaffhausen (0.26; 0.62) and Appenzell Ausserrhoden (0.45; 0.55) |
|                    | $\sim$ INSFRA | 0.357    | 0.565                         |                                                                                                            |
| 3.                 | OVDDBZ        | 0.857    | 0.902                         | Schaffhausen (0.48; 0.62) and Uri (0.45; 0.72)                                                             |
|                    | $\sim$ OVDDBZ | 0.527    | 0.553                         |                                                                                                            |
| 4.                 | DEMO          | 0.712    | 0.576                         |                                                                                                            |
|                    | $\sim$ DEMO   | 0.497    | 0.745                         |                                                                                                            |
| 5.                 | ECOPOW        | 0.372    | 0.471                         |                                                                                                            |
|                    | $\sim$ ECOPOW | 0.836    | 0.752                         |                                                                                                            |
| 6.                 | URBPOP        | 0.681    | 0.533                         |                                                                                                            |
|                    | $\sim$ URBPOP | 0.475    | 0.761                         |                                                                                                            |

Table C.2: Necessity analysis for the outcome  $\sim$ URBSPPRA

| Outcome : $\sim$ URBSPPRA |               |          |                               |                                                          |
|---------------------------|---------------|----------|-------------------------------|----------------------------------------------------------|
| Conditions                | Consistency   | Coverage | Logically contradictory cases |                                                          |
| 1.                        | MUNAUT        | 0.633    | 0.450                         |                                                          |
|                           | $\sim$ MUNAUT | 0.528    | 0.829                         |                                                          |
| 2.                        | INSFRA        | 0.695    | 0.494                         |                                                          |
|                           | $\sim$ INSFRA | 0.575    | 0.821                         |                                                          |
| 3.                        | OVDDBZ        | 0.528    | 0.502                         |                                                          |
|                           | $\sim$ OVDDBZ | 0.897    | 0.849                         | Appenzell Innerrhoden (0.38; 0.63) and Vaud (0.47; 0.57) |
| 4.                        | DEMO          | 0.812    | 0.593                         |                                                          |
|                           | $\sim$ DEMO   | 0.419    | 0.568                         |                                                          |
| 5.                        | ECOPOW        | 0.695    | 0.793                         |                                                          |
|                           | $\sim$ ECOPOW | 0.536    | 0.435                         |                                                          |
| 6.                        | URBPOP        | 0.835    | 0.589                         |                                                          |
|                           | $\sim$ URBPOP | 0.338    | 0.489                         |                                                          |

## 2. SUFFICIENCY ANALYSIS FOR THE OUTCOME URBSPPRA

Outcome: URBSPPRA

### Logical remainders

45 logical remainders resulted from the truth table analysis (presented in the main text). The following logical remainders were included into the logical minimization based on theoretical and substantial knowledge:

MUNAUT\*INSFRA\*~OVDBZ\*~DEMO\*~ECOPOW\*URBPOP  
MUNAUT\*~INSFRA\*~OVDBZ\*~DEMO\*~ECOPOW\*~URBPOP  
MUNAUT\*~INSFRA\*OVDBZ\*~DEMO\*~ECOPOW\*~URBPOP  
MUNAUT\*~INSFRA\*OVDBZ\*~DEMO\*ECOPOW\*URBPOP  
MUNAUT\*~INSFRA\*~OVDBZ\*~DEMO\*ECOPOW\*~URBPOP  
~MUNAUT\*INSFRA\*OVDBZ\*DEMO\*~ECOPOW\*~URBPOP

For every empirically observed sufficient combination that included ~MUNAUT, ~INSFRA, ~OVDBZ and/or URBPOP, similar combinations but with MUNAUT, INSFRA, OVDBZ or ~URBPOP were selected. This is coherent with the formulated hypotheses and with the context knowledge. For example, since high degrees of urban sprawl are observed in a case with MUNAUT\*~INSFRA\*~OVDBZ\*~DEMO\*~ECOPOW\*URBPOP (Uri-UR), we can safely assume that the same combination but with in addition high degrees of institutional fragmentation (MUNAUT\*INSFRA\*~OVDBZ\*~DEMO\*~ECOPOW\*URBPOP) will yield high degrees of urban sprawl too. Thus, it can be used as easy counterfactual.

### Prime implicants

MUNAUT\*~INSFRA\*~DEMO\*~ECOPOW\*URBPOP; MUNAUT\*OVDBZ\*~DEMO\*~ECOPOW;  
MUNAUT\*INSFRA\*OVDBZ\*~ECOPOW

### Directional expectations

MUNAUT -> URBSPPRA  
INSFRA -> URBSPPRA  
OVDBZ -> URBSPPRA  
~URBPOP -> URBSPPRA

### Intermediate solution

MUNAUT\*INSFRA\*OVDBZ\*~ECOPOW + (FR, GL, JU, TG, VS) Consistency: 0.97 Raw coverage: 0.66  
MUNAUT\*INSFRA\*OVDBZ\*~DEMO\*~URBPOP + (GR, JU) Consistency: 1.00 Raw coverage: 0.26  
MUNAUT\*~INSFRA\*~DEMO\*URBPOP + (AR, SH, UR) Consistency: 0.94 Raw coverage: 0.23  
INSFRA\*OVDBZ\*DEMO\*~ECOPOW (AG, FR, SO, TG, VS) Consistency: 0.96 Raw coverage: 0.56  
solution coverage: 0.77  
solution consistency: 0.95

### Conservative solution

MUNAUT\*INSFRA\*OVDBZ\*~ECOPOW + (FR, GL, JU, TG, VS) Consistency: 0.97 Raw coverage: 0.66  
MUNAUT\*INSFRA\*OVDBZ\*~DEMO\*~URBPOP + (GR, JU) Consistency: 1.00 Raw coverage: 0.26  
MUNAUT\*~INSFRA\*~DEMO\*~ECOPOW\*URBPOP + (AR, UR) Consistency: 1.00 Raw coverage: 0.19  
MUNAUT\*~INSFRA\*~OVDBZ\*~DEMO\*URBPOP + (SH, UR) Consistency: 0.95 Raw coverage: 0.19  
INSFRA\*OVDBZ\*DEMO\*~ECOPOW\*URBPOP (AG, FR, SO, VS) Consistency: 0.94 Raw coverage: 0.40  
solution coverage: 0.76  
solution consistency: 0.95

### Parsimonious solution

MUNAUT\*INSFRA\*OVDBZ\*~DEMO\*~URBPOP + (GR, JU) Consistency: 1.00 Raw coverage: 0.26  
MUNAUT\*OVDBZ\*~DEMO\*~ECOPOW + (AR, GL, JU) Consistency: 0.99 Raw coverage: 0.40  
MUNAUT\*~INSFRA\*~DEMO\*URBPOP + (AR, SH, UR) Consistency: 0.94 Raw coverage: 0.23  
INSFRA\*OVDBZ\*DEMO\*~ECOPOW (AG, FR, SO, TG, VS) Consistency: 0.96 Raw coverage: 0.56  
solution coverage: 0.79  
solution consistency: 0.95

### 3. ROBUSTNESS TEST FOR THE ANALYSIS OF THE OUTCOME URBSRA

In order to verify the robustness of the results, we performed two types of alternative analysis. First, with run the sufficiency analysis for URBSRA with two alternative calibrations of the set of the outcome. In section 3.1 we present the analysis with the crossover point of URBSRA lowered to 10'000 UPU / inhabitant and job, while in section 3.2 we present the analysis with the crossover point raised to 13'000 UPU / inhabitant and job. In section 3.3 we present the second type of alternative analysis: starting from the same truth table as in the paper, the raw consistency cut-off value is raised to 0.96 (URBSRA is calibrated to 11'000 UPU / inhabitant and job like in the main analysis).

#### 3.1 URBSRA\_10000 (crossover point lowered to 10'000 UPU / inhabitant and job)

##### Necessity analysis

No necessary conditions were found.

Table C.3: Necessity analysis for the outcome URBSRA\_10000

| Outcome : URBSRA_10000 |         |             |          |                                                                                                                                                 |
|------------------------|---------|-------------|----------|-------------------------------------------------------------------------------------------------------------------------------------------------|
| Conditions             |         | Consistency | Coverage | Logically contradictory cases                                                                                                                   |
| 1.                     | MUNAUT  | 0.892       | 0.799    | Solothurn (0.33; 0.90) and Aargau (0.33; 0.78)                                                                                                  |
|                        | ~MUNAUT | 0.277       | 0.497    |                                                                                                                                                 |
| 2.                     | INFRA   | 0.860       | 0.770    | Uri (0.45; 0.80), Obwalden (0.36; 0.76), Schaffhausen (0.26; 0.73), Appenzell Ausserrhoden (0.45; 0.68) and Appenzell Innerrhoden (0.26; 0.54), |
|                        | ~INFRA  | 0.350       | 0.630    |                                                                                                                                                 |
| 3.                     | OVDDBZ  | 0.786       | 0.941    |                                                                                                                                                 |
|                        | ~OVDDBZ | 0.527       | 0.629    |                                                                                                                                                 |
| 4.                     | DEMO    | 0.712       | 0.655    |                                                                                                                                                 |
|                        | ~DEMO   | 0.476       | 0.812    |                                                                                                                                                 |
| 5                      | ECOPOW  | 0.385       | 0.553    |                                                                                                                                                 |
|                        | ~ECOPOW | 0.806       | 0.825    |                                                                                                                                                 |
| 6.                     | URBPOP  | 0.681       | 0.606    |                                                                                                                                                 |
|                        | ~URBPOP | 0.452       | 0.824    |                                                                                                                                                 |

##### Sufficiency analysis

Table C.4: Truth table for the outcome URBSRA\_10000

Raw consistency cut-off 0.94

| 1.     | 2.    | 3.     | 4.   | 5.     | 6.     | Num | Outcome | Raw      | PRI      | Cantons |
|--------|-------|--------|------|--------|--------|-----|---------|----------|----------|---------|
| MUNAUT | INFRA | OVDDBZ | DEMO | ECOPOW | URBPOP | ber |         | consist. | consist. |         |
| 1      | 1     | 1      | 0    | 0      | 0      | 1   | 1       | 1.00     | 1.00     | JU      |
| 1      | 1     | 1      | 1    | 0      | 0      | 1   | 1       | 1.00     | 1.00     | TG      |
| 1      | 1     | 1      | 0    | 1      | 0      | 1   | 1       | 1.00     | 1.00     | GR      |
| 1      | 0     | 0      | 0    | 0      | 1      | 1   | 1       | 1.00     | 1.00     | UR      |
| 1      | 0     | 1      | 0    | 0      | 1      | 1   | 1       | 1.00     | 1.00     | AR      |
| 1      | 1     | 1      | 0    | 0      | 1      | 1   | 1       | 1.00     | 1.00     | GL      |
| 1      | 1     | 1      | 1    | 0      | 1      | 2   | 1       | 0.98     | 0.95     | FR, VS  |
| 1      | 1     | 0      | 0    | 1      | 1      | 1   | 1       | 0.98     | 0.88     | BE      |
| 1      | 0     | 0      | 0    | 1      | 1      | 1   | 1       | 0.98     | 0.90     | SH      |
| 1      | 0     | 1      | 1    | 0      | 0      | 2   | 1       | 0.97     | 0.90     | AI, OW  |
| 1      | 1     | 1      | 1    | 1      | 1      | 2   | 1       | 0.96     | 0.85     | TI, VD  |
| 1      | 1     | 0      | 1    | 0      | 0      | 1   | 1       | 0.94     | 0.75     | LU      |
| 0      | 1     | 1      | 1    | 0      | 1      | 2   | 1       | 0.94     | 0.83     | AG, SO  |
| 0      | 1     | 0      | 1    | 0      | 1      | 1   | 0       | 0.90     | 0.72     | SZ      |
| 1      | 1     | 0      | 1    | 1      | 1      | 2   | 0       | 0.90     | 0.64     | SG, BL  |
| 1      | 0     | 0      | 1    | 1      | 0      | 1   | 0       | 0.88     | 0.15     | NW      |
| 0      | 1     | 0      | 1    | 1      | 1      | 1   | 0       | 0.63     | 0.18     | ZH      |
| 0      | 0     | 0      | 0    | 1      | 1      | 2   | 0       | 0.49     | 0.05     | BS, NE  |
| 0      | 0     | 0      | 1    | 1      | 1      | 2   | 0       | 0.41     | 0.01     | GE, ZG  |

Logical remainders

The ESA procedure was applied. The following logical remainders were included into the logical minimization:

MUNAUT\*INSFRA\*~OVDBZ\*~DEMO\*~ECOPOW\*URBPOP  
MUNAUT\*~INSFRA\*~OVDBZ\*~DEMO\*~ECOPOW\*~URBPOP  
MUNAUT\*~INSFRA\*OVDBZ\*~DEMO\*~ECOPOW\*~URBPOP  
MUNAUT\*~INSFRA\*OVDBZ\*~DEMO\*ECOPOW\*URBPOP  
MUNAUT\*~INSFRA\*~OVDBZ\*~DEMO\*ECOPOW\*~URBPOP  
MUNAUT\*INSFRA\*OVDBZ\*~DEMO\*ECOPOW\*URBPOP  
MUNAUT\*INSFRA\*~OVDBZ\*~DEMO\*ECOPOW\*~URBPOP  
MUNAUT\*INSFRA\*OVDBZ\*DEMO\*ECOPOW\*~URBPOP  
~MUNAUT\*INSFRA\*OVDBZ\*DEMO\*~ECOPOW\*~URBPOP

#### *Directional expectations*

MUNAUT -> URBSPPRA\_10000

INSFRA -> URBSPPRA\_10000

OVDBZ -> URBSPPRA\_10000

~URBPOP -> URBSPPRA\_10000

#### *Intermediate solution*

MUNAUT\*~DEMO\*URBPOP + (AR, BE, GL, SH, UR) Consistency: 0.96 Raw coverage: 0.34  
MUNAUT\*INSFRA\*OVDBZ + (FR, GR, GL, JU, TG, TI, VD, VS) Consistency: 0.98 Raw coverage: 0.67  
INSFRA\*OVDBZ\*DEMO\*~ECOPOW + (AG, FR, SO, TG, VS) Consistency: 0.97 Raw coverage: 0.50  
MUNAUT\*INSFRA\*DEMO\*~ECOPOW\*~URBPOP + (LU, TG) Consistency: 0.95 Raw coverage: 0.29  
MUNAUT\*OVDBZ\*DEMO\*~ECOPOW\*~URBPOP (AI, OW, TG) Consistency: 0.99 Raw coverage: 0.31  
solution coverage: 0.85  
solution consistency: 0.94

With this alternative calibration, the complexity of the solution increases. This was expected since lowering the crossover point implies considering more cases as positive and thus including more rows into the logical minimization. This is reflected by the higher coverage values. The results remain highly consistent and does not differ importantly from those obtained with the original calibration of the outcome.

#### *Conservative solution*

MUNAUT\*~INSFRA\*~DEMO\*~ECOPOW\*URBPOP + (AR, UR) Consistency: 1.00 Raw coverage: 0.17  
MUNAUT\*INSFRA\*OVDBZ\*~DEMO\*~URBPOP + (GR, JU) Consistency: 1.00 Raw coverage: 0.23  
MUNAUT\*INSFRA\*DEMO\*~ECOPOW\*~URBPOP + (LU, TG) Consistency: 0.95 Raw coverage: 0.29  
MUNAUT\*OVDBZ\*DEMO\*~ECOPOW\*~URBPOP + (AI, OW, TG) Consistency: 0.99 Raw coverage: 0.31  
MUNAUT\*OVDBZ\*~DEMO\*~ECOPOW\*URBPOP + (AR, GL) Consistency: 1.00 Raw coverage: 0.25  
MUNAUT\*~OVDBZ\*~DEMO\*ECOPOW\*URBPOP + (BE, SH) Consistency: 0.98 Raw coverage: 0.18  
INSFRA\*OVDBZ\*DEMO\*~ECOPOW\*URBPOP + (AG, FR, SO, VS) Consistency: 0.96 Raw coverage: 0.36  
MUNAUT\*INSFRA\*OVDBZ\*DEMO\*URBPOP (FR, TI, VD, VS) Consistency: 0.96 Raw coverage: 0.38  
solution coverage: 0.76  
solution consistency: 0.94

#### *Parsimonious solution*

MUNAUT\*INSFRA\*OVDBZ + (FR, GL, GR, JU, TG, TI, VD, VS) Consistency: 0.98 Raw coverage: 0.67  
MUNAUT\*OVDBZ\*~ECOPOW\*~URBPOP + (AI, JU, OW, TG) Consistency: 0.99 Raw coverage: 0.38  
INSFRA\*OVDBZ\*DEMO\*~ECOPOW + (AG, FR, SO, TG, VS) Consistency: 0.97 Raw coverage: 0.50  
MUNAUT\*INSFRA\*DEMO\*~ECOPOW\*~URBPOP + (LU, TG) Consistency: 0.95 Raw coverage: 0.29  
MUNAUT\*~DEMO\*URBPOP (AR, BE, GL, SH, UR) Consistency: 0.96 Raw coverage: 0.34  
solution coverage: 0.85  
solution consistency: 0.94

### 3.2 URBSPPRA\_13000 (crossover point raised to 13'000 UPU / inhabitant and job)

In this case, the direct calibration algorithm built in the fs-QCA software returned a 0.5 membership value for Glarus since its raw data value is 13'006 UPU/inhabitant + job. We raised its membership to 0.55 in order to include it in set of the outcome.

### Necessity analysis

Two consistent necessary conditions were identified (INSFRA and OVDBZ). It is not rare to encounter necessary conditions when raising the crossover point: since fewer cases now qualify as instances of URBSRPA\_13000, it is less likely to encounter cases which logically contradict the necessity relation. The ESA procedure was applied for the sufficiency analysis to avoid assumptions that contradict the statement of necessity.

Table C.5: Necessity analysis for the outcome URBSRPA\_13000

| Outcome : URBSRPA_13000 |               |              |              |                                                |
|-------------------------|---------------|--------------|--------------|------------------------------------------------|
| Conditions              |               | Consistency  | Coverage     | Logically contradictory cases                  |
| 1.                      | MUNAUT        | 0.921        | 0.537        | Solothurn (0.33; 0.72)                         |
|                         | ~MUNAUT       | 0.326        | 0.381        |                                                |
| 2.                      | <b>INSFRA</b> | <b>0.970</b> | <b>0.566</b> | -                                              |
|                         | ~INSFRA       | 0.349        | 0.409        |                                                |
| 3.                      | <b>OVDBZ</b>  | <b>0.947</b> | <b>0.738</b> | -                                              |
|                         | ~OVDBZ        | 0.528        | 0.410        |                                                |
| 4.                      | DEMO          | 0.746        | 0.447        |                                                |
|                         | ~DEMO         | 0.504        | 0.560        |                                                |
| 5.                      | ECOPOW        | 0.369        | 0.346        |                                                |
|                         | ~ECOPOW       | 0.866        | 0.577        | Graubünden (0.42; 0.96) and Ticino (0.2; 0.66) |
| 6.                      | URBPOP        | 0.662        | 0.384        |                                                |
|                         | ~URBPOP       | 0.555        | 0.659        |                                                |

### Sufficiency analysis

#### Truth table

Table C.6: Truth table for the outcome URBSRPA\_13000

Raw consistency cut-off 0.90

| 1.<br>MUNAUT | 2.<br>INSFRA | 3.<br>OVDBZ | 4.<br>DEMO | 5.<br>ECOPOW | 6.<br>URBPOP | Num<br>ber | Outcome | Raw<br>consist. | PRI<br>consist. | Cantons |
|--------------|--------------|-------------|------------|--------------|--------------|------------|---------|-----------------|-----------------|---------|
| 1            | 1            | 1           | 0          | 0            | 0            | 1          | 1       | 0.97            | 0.92            | JU      |
| 1            | 1            | 1           | 0          | 1            | 0            | 1          | 1       | 0.95            | 0.84            | GR      |
| 1            | 1            | 1           | 1          | 0            | 0            | 1          | 1       | 0.91            | 0.79            | TG      |
| 1            | 1            | 1           | 0          | 0            | 1            | 1          | 0       | 0.87            | 0.39            | GL      |
| 1            | 0            | 0           | 0          | 0            | 1            | 1          | 0       | 0.87            | 0               | UR      |
| 1            | 0            | 1           | 0          | 0            | 1            | 1          | 0       | 0.86            | 0.17            | AR      |
| 1            | 1            | 1           | 1          | 0            | 1            | 2          | 0       | 0.85            | 0.65            | VS, FR  |
| 1            | 0            | 0           | 0          | 1            | 1            | 1          | 0       | 0.79            | 0               | SH      |
| 0            | 1            | 1           | 1          | 0            | 1            | 2          | 0       | 0.78            | 0.39            | AG, SO  |
| 0            | 1            | 0           | 1          | 0            | 1            | 1          | 0       | 0.75            | 0.28            | SZ      |
| 1            | 1            | 0           | 1          | 0            | 0            | 1          | 0       | 0.74            | 0.28            | LU      |
| 1            | 1            | 1           | 1          | 1            | 1            | 2          | 0       | 0.74            | 0.28            | TI, VD  |
| 1            | 1            | 0           | 0          | 1            | 1            | 1          | 0       | 0.73            | 0               | BE      |
| 1            | 0            | 0           | 1          | 1            | 0            | 1          | 0       | 0.72            | 0.10            | NW      |
| 1            | 0            | 1           | 1          | 0            | 0            | 2          | 0       | 0.72            | 0.22            | AI, OW  |
| 1            | 1            | 0           | 1          | 1            | 1            | 2          | 0       | 0.59            | 0.02            | BL, SG  |
| 0            | 1            | 0           | 1          | 1            | 1            | 1          | 0       | 0.50            | 0               | ZH      |
| 0            | 0            | 0           | 0          | 1            | 1            | 2          | 0       | 0.42            | 0               | BS, NE  |
| 0            | 0            | 0           | 1          | 1            | 1            | 2          | 0       | 0.36            | 0               | GE, ZG  |

#### Logical remainders

The following logical remainders were included into the logical minimization:

MUNAUT\*INSFRA\*OVDBZ\*DEMO\*ECOPOW\*~URBPOP  
MUNAUT\*INSFRA\*OVDBZ\*~DEMO\*ECOPOW\*URBPOP

### *Directional expectations*

MUNAUT -> URBSPPRA\_13000  
INSFRA -> URBSPPRA\_13000  
OVDBZ -> URBSPPRA\_13000  
~URBPOP -> URBSPPRA\_13000

### *Intermediate solution*

MUNAUT\*INSFRA\*OVDBZ\*~ECOPOW\*~URBPOP + (JU, TG) Consistency: 0.93 Raw coverage: 0.49  
MUNAUT\*INSFRA\*OVDBZ\*~DEMO\*~URBPOP (GR, JU) Consistency: 0.95 Raw coverage: 0.33  
solution coverage: 0.50  
solution consistency: 0.92

Here we observe the opposite trend compared to the analysis for URBSPPRA\_10000. Raising the crossover point means that fewer cantons qualify as positive cases, thus fewer rows are included in the minimization and the solution is less complex. Once again the results are highly consistent. The first combination is similar to Solution 1a from the analysis presented in the paper, while the second is identical to Solution 1b. Raising the crossover point means that only the strongest instances of URBSPPRA are included in the minimization. Hence, this robustness test confirms the importance of Solutions 1a and 1b, and of the role played by the association of MUNAUT, INSFRA and OVDBZ. This further corroborates our hypotheses.

### *Conservative solution*

The conservative solution is identical to the intermediate solution.

### *Parsimonious solution*

MUNAUT\*INSFRA\*OVDBZ\*~URBPOP (GR, JU, TG) Consistency: 0.92 Raw coverage: 0.52  
solution coverage: 0.52  
solution consistency: 0.92

### *3.3 Alternative analysis for URBSPPRA: raw consistency cut-off raised to 0.96*

Outcome: URBSPPRA Raw consistency cut-off 0.96  
The truth table is provided in the main text.

### **Logical remainders**

The following logical remainders were included into the logical minimization:

MUNAUT\*INSFRA\*~OVDBZ\*~DEMO\*~ECOPOW\*URBPOP  
MUNAUT\*~INSFRA\*~OVDBZ\*~DEMO\*~ECOPOW\*~URBPOP  
MUNAUT\*~INSFRA\*OVDBZ\*~DEMO\*~ECOPOW\*~URBPOP

### **Prime implicants**

MUNAUT\*~INSFRA\*~DEMO\*~ECOPOW

### **Directional expectations**

MUNAUT -> URBSPPRA  
INSFRA -> URBSPPRA  
OVDBZ -> URBSPPRA  
~URBPOP -> URBSPPRA

### **Intermediate solution**

MUNAUT\*INSFRA\*OVDBZ\*~ECOPOW\* + (FR, GL, JU, TG, VS) Consistency: 0.97 Raw coverage: 0.66  
MUNAUT\*INSFRA\*OVDBZ\*~DEMO\*~URBPOP + (GR, JU) Consistency: 1.00 Raw coverage: 0.26

MUNAUT\*~INSFRA\*~DEMO\*~ECOPOW (AR, UR) Consistency: 1.00 Raw coverage: 0.24  
solution coverage: 0.70  
solution consistency: 0.97

#### **Conservative solution**

MUNAUT\*INSFRA\*OVDBZ\*~ECOPOW\* (FR, GL, JU, TG, VS) Consistency: 0.97 Raw coverage: 0.66  
MUNAUT\*INSFRA\*OVDBZ\*~DEMO\*~URBPOP (GR, JU) Consistency: 1.00 Raw coverage: 0.26  
MUNAUT\*~INSFRA\*~DEMO\*~ECOPOW\*URBPOP (AR, UR) Consistency: 1.00 Raw coverage: 0.19  
solution coverage: 0.69  
solution consistency: 0.98

#### **Parsimonious solution**

The parsimonious solution is identical to the intermediate solution.

#### **4. SUFFICIENCY ANALYSIS FOR THE OUTCOME ~URBSPRA**

~URBSPRA

## Truth table

C.7: Truth table for the outcome  $\sim$ URBSPRA

Raw consistency cut-off 0.91

| 1.<br>MUNAUT | 2.<br>INSFRA | 3.<br>OVDBZ | 4.<br>DEMO | 5.<br>ECOPOW | 6.<br>URBPOP | Number | Outcome | Raw<br>consist. | PRI<br>consist. | Cantons       |
|--------------|--------------|-------------|------------|--------------|--------------|--------|---------|-----------------|-----------------|---------------|
| 0            | 0            | 0           | 0          | 1            | 1            | 2      | 1       | 1.00            | 1.00            | <b>BS, NE</b> |
| 0            | 0            | 0           | 1          | 1            | 1            | 2      | 1       | 1.00            | 1.00            | <b>GE, ZG</b> |
| 1            | 0            | 0           | 1          | 1            | 0            | 1      | 1       | 0.97            | 0.88            | <b>NW</b>     |
| 0            | 1            | 0           | 1          | 1            | 1            | 1      | 1       | 0.93            | 0.86            | <b>ZH</b>     |
| 1            | 1            | 0           | 0          | 1            | 1            | 1      | 1       | 0.92            | 0.52            | <b>BE</b>     |
| 1            | 1            | 0           | 1          | 1            | 1            | 2      | 1       | 0.91            | 0.71            | <b>BL, SG</b> |
| 1            | 0            | 0           | 0          | 1            | 1            | 1      | 0       | 0.88            | 0.39            | SH            |
| 1            | 1            | 0           | 1          | 0            | 0            | 1      | 0       | 0.87            | 0.51            | <b>LU</b>     |
| 1            | 0            | 0           | 0          | 0            | 1            | 1      | 0       | 0.84            | 0               | UR            |
| 1            | 0            | 1           | 1          | 0            | 0            | 2      | 0       | 0.84            | 0.38            | <b>AI, OW</b> |
| 1            | 1            | 1           | 1          | 1            | 1            | 2      | 0       | 0.83            | 0.35            | <b>TI, VD</b> |
| 0            | 1            | 0           | 1          | 0            | 1            | 1      | 0       | 0.79            | 0.35            | <b>SZ</b>     |
| 1            | 0            | 1           | 0          | 0            | 1            | 1      | 0       | 0.79            | 0               | AR            |
| 1            | 1            | 1           | 0          | 0            | 1            | 1      | 0       | 0.74            | 0               | GL            |
| 0            | 1            | 1           | 1          | 0            | 1            | 2      | 0       | 0.72            | 0.22            | <b>AG, SO</b> |
| 1            | 1            | 1           | 0          | 1            | 0            | 1      | 0       | 0.67            | 0               | GR            |
| 1            | 1            | 1           | 1          | 0            | 1            | 2      | 0       | 0.64            | 0.10            | <b>FR, VS</b> |
| 1            | 1            | 1           | 1          | 0            | 0            | 1      | 0       | 0.61            | 0.02            | TG            |
| 1            | 1            | 1           | 0          | 0            | 0            | 1      | 0       | 0.59            | 0               | JU            |

19 combinations of conditions were empirically observed. The positive cases are in bold.

### Logical remainders

45 logical remainders resulted from the truth table. The following were included into the logical minimization:

$\sim$ MUNAUT\* $\sim$ INSFRA\* $\sim$ OVDBZ\*DEMO\*ECOPOW\* $\sim$ URBPOP  
 $\sim$ MUNAUT\*INSFRA\* $\sim$ OVDBZ\* $\sim$ DEMO\*ECOPOW\*URBPOP  
MUNAUT\* $\sim$ INSFRA\* $\sim$ OVDBZ\*DEMO\*ECOPOW\*URBPOP

### Prime implicants

$\sim$ MUNAUT\* $\sim$ OVDBZ\*DEMO\*ECOPOW\*URBPOP

### Directional expectations

$\sim$ MUNAUT  $\rightarrow$   $\sim$ URBSPRA  
 $\sim$ INSFRA  $\rightarrow$   $\sim$ URBSPRA  
 $\sim$ OVDBZ  $\rightarrow$   $\sim$ URBSPRA  
URBPOP  $\rightarrow$   $\sim$ URBSPRA

### Intermediate solution

$\sim$ INSFRA\* $\sim$ OVDBZ\*DEMO\*ECOPOW\* + (GE, NW, ZG) Consistency: 0.99 Raw coverage: 0.31  
 $\sim$ MUNAUT\* $\sim$ OVDBZ\*ECOPOW\*URBPOP + (BS, GE, NE, ZG, ZH) Consistency: 0.96 Raw coverage: 0.46  
INSFRA\* $\sim$ OVDBZ\*ECOPOW\*URBPOP + (BE, BL, SG, ZH) Consistency: 0.91 Raw coverage: 0.40  
solution coverage: 0.63  
solution consistency: 0.93

### Conservative solution

$\sim$ MUNAUT\* $\sim$ INSFRA\* $\sim$ OVDBZ\*ECOPOW\*URBPOP + (BS, GE, NE, ZG) Consistency: 1.00 Raw coverage: 0.32



MUNAUT\*INFRA\*~OVDBZ\*ECOPOW\*URBPOP (BE, BL, SG) Consistency: 0.88 Raw coverage: 0.30  
MUNAUT\*~INFRA\*~OVDBZ\*DEMO\*ECOPOW\*~URBPOP + (NW) Consistency: 0.97 Raw coverage: 0.11  
~MUNAUT\*~OVDBZ\*DEMO\*ECOPOW\*URBPOP + (GE, ZG, ZH) Consistency: 0.95 Raw coverage: 0.38  
solution coverage: 0.63  
solution consistency: 0.93

### **Parsimonious solution**

The parsimonious solution is identical to the intermediate solution.
